# Supplementary material for: Solar-driven oil spill recovery using a carbon dots/loofah sponge
Source: Royal Society of Chemistry journal article supplement (doi:10.1039/d5ra08252h), 2026-01-01
Supplement: d5ra08252h1.pdf [file d5ra08252h1.pdf]

## Supplementary material

### Solar-driven oil spills recover using Carbon dots/loofah sponge

Le Thi Hau<sup>1</sup>, Tran Thu Thuy<sup>1</sup>, Nguyen Thi Bich Ngoc<sup>1</sup>, Vanthan Nguyen<sup>2</sup>, Vu Thi Hong Ha<sup>1</sup>,  
Vu Ngoc Hung<sup>1</sup>, Ho-Suk Choi<sup>3</sup>, Nang Xuan Ho<sup>4</sup>, Do Dieu Linh<sup>5</sup>, Van-Duong Dao<sup>1\*</sup>

<sup>1</sup>Faculty of Biotechnology, Chemistry and Environmental Engineering, PHENIKAA School  
of Engineering, PHENIKAA University, Hanoi 12116, Vietnam

<sup>2</sup>Faculty of Mechanical - Electrical and Computer Engineering, School of Technology, Van  
Lang University, Ho Chi Minh City, Vietnam

<sup>3</sup>Department of Chemical Engineering and Applied Chemistry, Chungnam National  
University, Daejeon 99, Korea

<sup>4</sup>Faculty of Vehicle and Energy Engineering, PHENIKAA School of Engineering,  
PHENIKAA University, Hanoi Hanoi 12116, Vietnam

<sup>5</sup>High School for Gifted Students, VNU University of Science, Hanoi 10000, Vietnam

**Le Thi Hau, Tran Thu Thuy and Nguyen Thi Bich Ngoc contributed equally to this  
work**

\*Corresponding author: Email: [duong.daovan@phenikaa-uni.edu.vn](mailto:duong.daovan@phenikaa-uni.edu.vn)

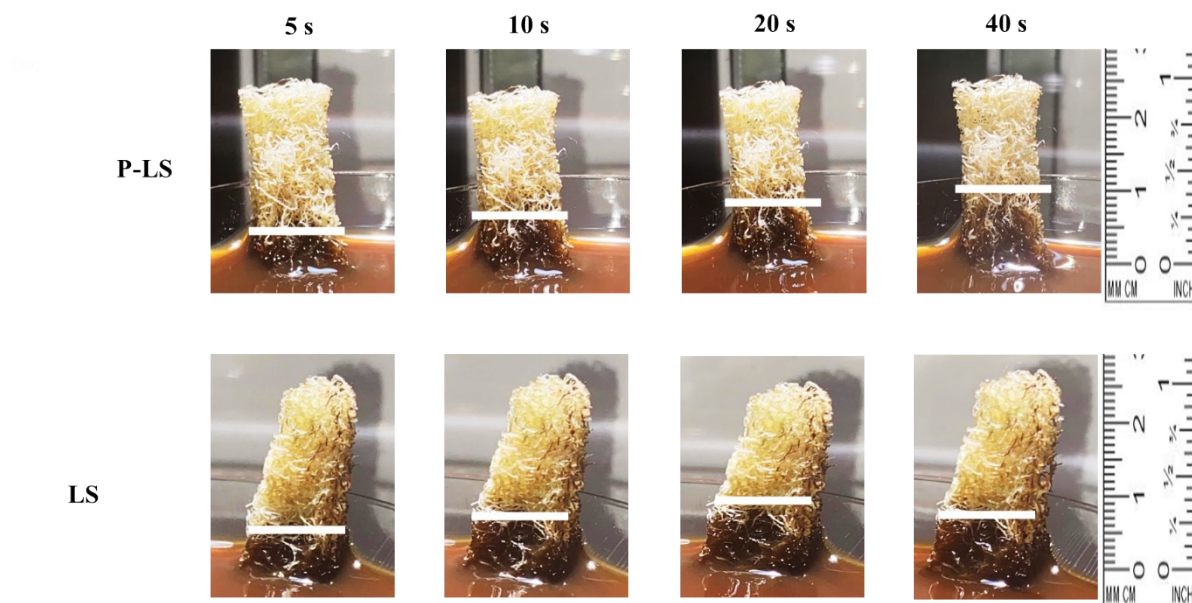

**Fig S1.** Oil absorption rate of LS and P-LS toward vehicle wasted oil.

**(a)**

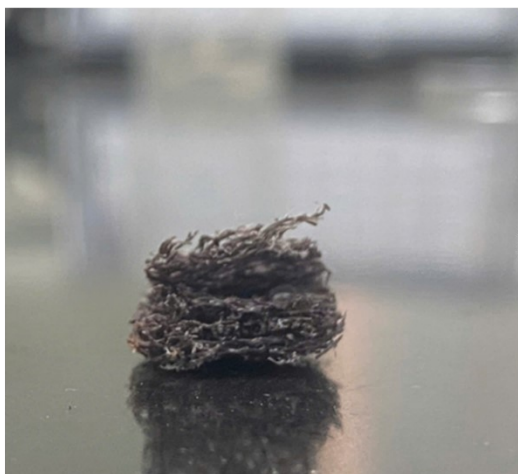

**(b)**

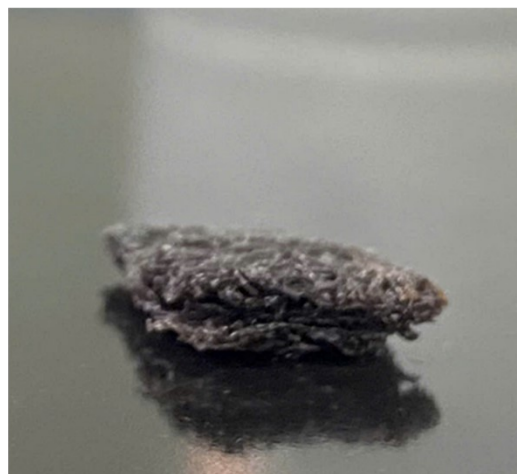

**Fig S2.** Initial structure of P-CLS (a) and after the recovery process by using mechanical methods (b).

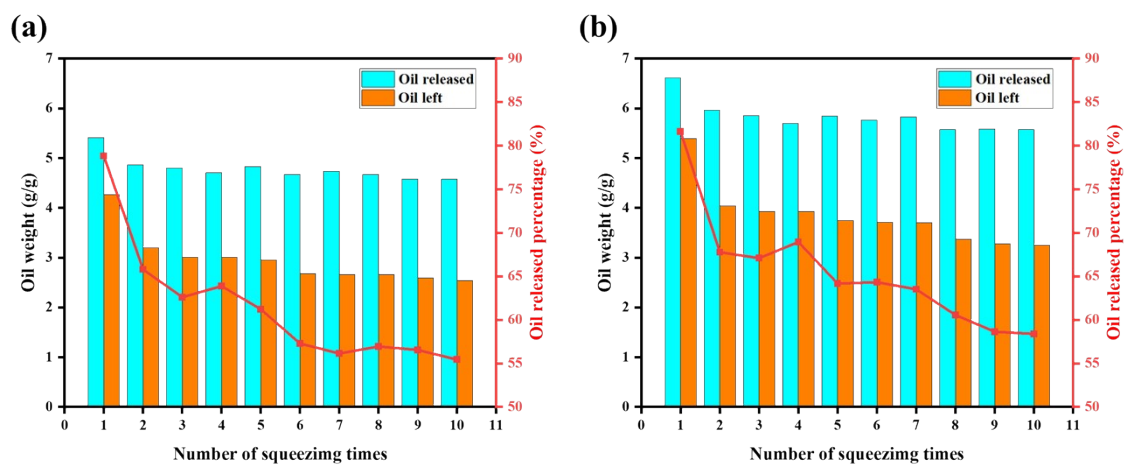

**Fig S3.** Oil recovery rate from P-CLS in the irradiation (a) and dark condition (b) by using external mechanical methods.

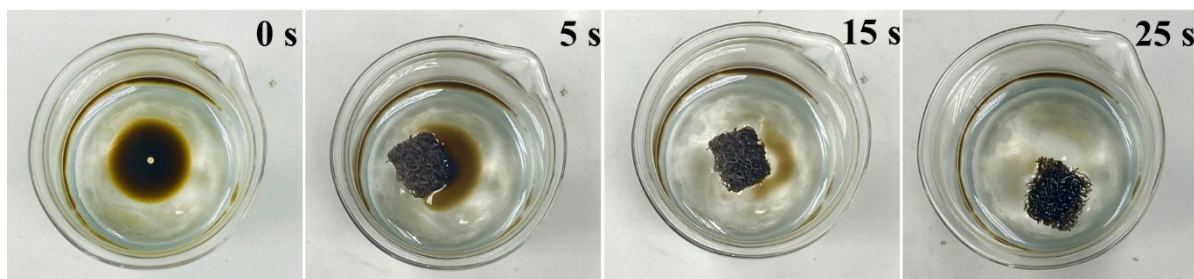

**Fig S4.** Absorption process of P-CLS
